# Supplementary material for: Similar Seed Composition Phenotypes Are Observed From CRISPR-Generated In-Frame and Knockout Alleles of a Soybean KASI Ortholog
Source: Front Plant Sci. 2020 Jul 8;11:1005. doi: 10.3389/fpls.2020.01005 (PMC7381328; doi:10.3389/fpls.2020.01005)
Supplement: Supplementary file 2 [file Table_2.xlsx]

## Sheet: Supp Table 2
Supplementary Table S2. NIR data for seed composition traits from ground seeds of GmKASI CRISPR edited soybean (Experiment #2).
Plants	Plant generation	Family	Plant genotype	Edit-exon1	Edit-exon2	NIR seed scanned	Moisture	Protein Dry basis	Oil Dry basis	Lysine Dry basis	Cysteine Dry basis	Methionine Dry basis	Isoleucine Dry basis	Leucine Dry basis	Histidine Dry basis	Phenylalanine Dry basis	Valine Dry basis	Alanine Dry basis	Arginine Dry basis	Aspartic acid Dry basis	Glutamic acid Dry basis	Glycine Dry basis	Proline Dry basis	Serine Dry basis	Tyrosine Dry basis	Hydroxylysine Dry basis	Hydroxyproline Dry basis	Lanthionine Dry basis	Ornithine Dry basis	Taurine Dry basis	Sucrose Dry basis	Raffinose Dry basis	Stachyose Dry basis	Fiber Dry basis	Linoleic acid Dry basis	Linolenic acid Dry basis	Ash Dry basis	Oleic acid Dry basis	Palmitic acid Dry basis	Stearic acid Dry basis	Starch Dry basis	Available Lysine Dry basis	Fructose Dry basis	Glucose Dry basis	Threonine Dry basis	Tryptophan Dry basis
677-3-35-03	T2M2	KO-Mut	Mutant	+107/+107	Wt/Wt	T3M3	3.62	40.52	4.41	2.61	0.62	0.56	1.81	2.85	1.1	1.98	1.97	1.65	3.01	4.14	6.1	1.56	1.89	1.6	1.39	0.03	0.12	-0.02	0.05	0.05	12.3	0.44	4.71	9.69	47.24	16.97	4.9	20.15	11.6	5.13	2.24	2.31	0.38	0.74	1.49	0.35
677-3-35-05	T2M2	KO-Mut	Mutant	+107/+107	Wt/Wt	T3M3	2.38	36.77	6.29	2.44	0.61	0.53	1.66	2.65	1.02	1.81	1.79	1.53	2.65	3.78	5.53	1.47	1.76	1.53	1.34	0.04	0.12	0.04	0.04	0.08	11.29	0.29	3.62	9.2	43.84	17.62	5	22.68	10.97	5.31	0.49	2.2	0.37	0.7	1.44	0.35
677-3-35-14	T2M2	KO-Mut	Mutant	+107/+107	Wt/Wt	T3M3	3.11	37.86	6.46	2.53	0.61	0.56	1.71	2.71	1.07	1.86	1.88	1.56	2.73	3.95	5.69	1.49	1.78	1.57	1.35	0.05	0.12	0.01	0.04	0.06	10.61	0.4	3.85	9.5	46.77	15.51	5.17	26.44	10.35	4.89	0.17	2.26	0.43	0.71	1.44	0.39
677-3-35-16	T2M2	KO-Mut	Mutant	+10/+10	Wt/Wt	T3M3	2.42	36.75	7.13	2.46	0.64	0.54	1.68	2.63	1.01	1.79	1.81	1.53	2.6	3.8	5.5	1.45	1.75	1.54	1.33	0.06	0.12	0.02	0.04	0.07	11.31	0.4	3.9	9.32	41.22	17.6	5.19	27.46	10.34	5.12	1.32	2.18	0.4	0.7	1.41	0.35
677-3-43-02	T2M2	KO-Het	Heterozygous	Wt/∆1(-G)	Wt/∆1(-C)	T3M3	3.61	41.87	13.44	2.77	0.72	0.65	1.92	3.06	1.13	2.04	2.06	1.75	3.01	4.62	6.79	1.75	1.94	1.78	1.54	0.06	0.13	-0.02	0.05	0.11	5.66	0.3	5.64	8.58	52.75	9.94	5.53	19.08	10.2	4.15	1.42	2.5	0.66	0.78	1.6	0.39
677-3-43-107	T2M2	KO-Het	Mutant	∆1(-G)/∆1(-G)	∆1(-C)/∆1(-C)	T3M3	3.05	41.4	5.73	2.68	0.65	0.58	1.83	2.96	1.12	2.01	2.02	1.68	3.09	4.31	6.43	1.63	1.92	1.7	1.45	0.04	0.12	-0.01	0.05	0.08	10.31	0.3	4.42	9.04	48.09	16.31	5.12	20.25	10.87	4.46	0.27	2.47	0.41	0.74	1.55	0.38
677-3-43-19	T2M2	KO-Het	Heterozygous	Wt/∆1(-G)	Wt/∆1(-C)	T3M3	3.49	40.85	13.32	2.71	0.7	0.62	1.89	3.02	1.11	2.02	2.01	1.72	2.98	4.57	6.67	1.72	1.92	1.8	1.52	0.06	0.14	-0.04	0.05	0.12	6.17	0.14	4.37	8.67	50.92	11.47	5.38	18.83	10.28	4.04	1.27	2.46	0.63	0.77	1.59	0.36
677-3-43-22	T2M2	KO-Het	Wild type	Wt/Wt	Wt/Wt	T3M3	3.85	41.52	16.82	2.76	0.75	0.67	1.95	3.03	1.08	2.02	2.01	1.75	2.88	4.74	6.97	1.76	1.89	1.8	1.54	0.09	0.14	0.05	0.04	0.12	4.68	0.26	5.85	8.58	55.92	7.37	5.8	20.2	9.76	4.66	1.34	2.51	0.77	0.79	1.57	0.34
677-3-43-28	T2M2	KO-Het	Wild type	Wt/Wt	Wt/Wt	T3M3	3.11	38.86	17.77	2.65	0.75	0.62	1.9	2.85	1.04	1.94	1.85	1.67	2.64	4.46	6.44	1.64	1.85	1.72	1.51	0.14	0.14	0.13	0.04	0.15	5.93	0.41	5.65	8.52	48.92	7.28	5.83	27.83	9.45	4.96	0.35	2.37	0.81	0.76	1.51	0.34
677-3-43-29	T2M2	KO-Het	Heterozygous	Wt/∆1(-G)	Wt/∆1(-C)	T3M3	2.92	40.52	15.03	2.65	0.69	0.6	1.88	3.03	1.07	2.02	1.99	1.72	2.9	4.52	6.7	1.72	1.95	1.78	1.53	0.06	0.14	0.01	0.04	0.12	5.03	0.19	4.33	8.2	50.69	10.84	5.51	17.8	11.1	4.33	0.91	2.44	0.73	0.78	1.6	0.37
677-3-43-35	T2M2	KO-Het	Wild type	Wt/Wt	Wt/Wt	T3M3	3.11	41.25	17.39	2.73	0.75	0.64	1.99	3.05	1.11	2.07	2.02	1.76	2.94	4.77	6.99	1.75	1.98	1.73	1.59	0.13	0.14	0.07	0.05	0.13	4.69	0.28	5.1	7.92	48.07	6.95	5.81	31.21	8.19	4.58	1.85	2.49	0.83	0.81	1.53	0.37
677-3-43-74	T2M2	KO-Het	Heterozygous	Wt/∆1(-G)	Wt/∆1(-C)	T3M3	3.72	41.04	13.77	2.74	0.69	0.62	1.91	3.07	1.1	2.06	2.02	1.74	3	4.61	6.83	1.74	1.95	1.81	1.56	0.07	0.14	0	0.05	0.12	6.34	0.42	5.06	8.16	56.66	12.04	5.24	12.56	10.3	3.77	1.93	2.5	0.7	0.79	1.61	0.38
677-3-43-75	T2M2	KO-Het	Wild type	Wt/Wt	Wt/Wt	T3M3	3.31	38.57	17.44	2.58	0.71	0.61	1.83	2.85	1.02	1.91	1.86	1.66	2.68	4.4	6.49	1.67	1.86	1.68	1.49	0.11	0.14	0.11	0.04	0.14	5.76	0.23	4.53	8.49	45.84	7.81	5.77	30.48	9.54	4.94	1.87	2.35	0.79	0.77	1.5	0.36
677-3-43-96	T2M2	KO-Het	Mutant	∆1(-G)/∆1(-G)	∆1(-C)/∆1(-C)	T3M3	2.76	37.76	6.63	2.54	0.67	0.58	1.67	2.71	1.04	1.83	1.83	1.56	2.76	3.93	5.79	1.5	1.81	1.58	1.37	0.05	0.12	0.02	0.04	0.08	11.92	0.43	4.01	8.71	42.41	16.68	4.92	26.56	10.98	5.11	1.75	2.31	0.42	0.72	1.46	0.41
677-3-43-99	T2M2	KO-Het	Mutant	∆1(-G)/∆1(-G)	∆1(-C)/∆1(-C)	T3M3	3.1	39.16	5.75	2.6	0.65	0.59	1.75	2.73	1.06	1.87	1.87	1.59	2.77	4.06	5.87	1.53	1.81	1.6	1.36	0.05	0.12	0.01	0.04	0.07	11.14	0.24	4.75	9.76	48.35	14.96	5.14	21.76	10.36	5.15	1.91	2.32	0.37	0.72	1.45	0.32
677-3-44-01	T2M2	KO-Mut	Mutant	∆1(-G)/∆1(-G)	Wt/Wt	T3M3	2.74	38.6	4.57	2.55	0.59	0.53	1.68	2.76	1.07	1.88	1.88	1.58	2.91	3.91	5.71	1.49	1.86	1.62	1.37	0.03	0.12	0	0.05	0.07	11.92	0.49	4.62	9.04	44.15	17.31	4.7	22.22	11.08	5.4	0.95	2.26	0.35	0.71	1.47	0.39
677-3-44-02	T2M2	KO-Mut	Mutant	∆1(-G)/+1(+A)	Wt/+1(+A)	T3M3	3.07	41.54	5.41	2.7	0.67	0.6	1.85	2.95	1.14	2.02	2.02	1.69	3.09	4.34	6.4	1.64	1.95	1.7	1.46	0.06	0.13	0.01	0.05	0.08	10.27	0.23	3.63	9.2	42.38	16.54	5.33	23.89	11.27	4.95	0.74	2.48	0.44	0.75	1.56	0.39
677-3-44-03	T2M2	KO-Mut	Mutant	∆1(-G)/+1(+A)	Wt/+1(+A)	T3M3	2.79	40.99	4.3	2.63	0.61	0.54	1.8	2.95	1.11	2.01	1.99	1.66	3.13	4.21	6.28	1.6	1.93	1.72	1.44	0.03	0.12	-0.03	0.05	0.07	10.68	0.19	4.1	9.13	41.72	19.01	4.95	22.82	11.53	4.52	0.3	2.43	0.38	0.74	1.58	0.38
677-3-44-04	T2M2	KO-Mut	Mutant	+1(+A)/+1(+A)	+1(+T)/+1(+T)	T3M3	2.93	41.78	6.53	2.68	0.64	0.58	1.87	3.03	1.14	2.08	2.07	1.7	3.18	4.37	6.6	1.63	2.01	1.72	1.49	0.06	0.12	0.01	0.05	0.08	9.7	0.31	3.55	8.57	41.57	16.96	5.13	29.81	9.97	4.29	0.43	2.48	0.48	0.77	1.58	0.44
677-3-44-12	T2M2	KO-Mut	Mutant	∆1(-G)/+1(+A)	Wt/+1(+A)	T3M3	2.43	35.74	5.48	2.44	0.56	0.52	1.63	2.58	1	1.77	1.76	1.49	2.57	3.67	5.25	1.4	1.7	1.48	1.28	0.02	0.12	0.02	0.04	0.07	13.2	0.35	4.68	9.41	48.01	17.43	4.68	20.43	10.33	5.51	1.99	2.15	0.29	0.68	1.37	0.29
677-3-44-16	T2M2	KO-Mut	Mutant	+1(+A)/+1(+A)	+1(+T)/+1(+T)	T3M3	2.86	39.83	5.57	2.59	0.64	0.56	1.79	2.84	1.09	1.96	1.94	1.63	2.95	4.11	6.03	1.55	1.91	1.63	1.42	0.06	0.13	0.01	0.04	0.08	11.09	0.3	3.66	9.27	46.55	17.68	5.09	21.54	10.98	4.89	0.78	2.32	0.41	0.73	1.5	0.37
677-3-44-18	T2M2	KO-Mut	Mutant	∆1(-G)/∆1(-G)	Wt/Wt	T3M3	2.31	34.34	5.04	2.36	0.58	0.53	1.58	2.44	0.97	1.65	1.71	1.43	2.4	3.45	4.86	1.32	1.62	1.4	1.23	0.02	0.11	0.04	0.04	0.06	13.27	0.56	4.89	9.84	42.01	16.48	4.84	26.24	10.72	5.74	2.21	2.01	0.33	0.67	1.3	0.33
677-3-44-19	T2M2	KO-Mut	Mutant	∆1(-G)/∆1(-G)	Wt/Wt	T3M3	2.57	37.58	5.37	2.5	0.61	0.54	1.68	2.67	1.04	1.83	1.84	1.54	2.72	3.87	5.63	1.46	1.79	1.59	1.32	0.03	0.12	0.02	0.04	0.06	11.68	0.34	4.54	9.84	45.97	16.98	5.03	21.94	10.72	5.21	0.51	2.21	0.36	0.71	1.41	0.34
677-3-47-01	T2M2	WT	Wild type	Wt/Wt	Wt/Wt	T3M3	3.08	35.6	18.53	2.43	0.64	0.56	1.72	2.71	0.96	1.83	1.79	1.57	2.44	4.02	5.93	1.56	1.73	1.61	1.4	0.06	0.13	0.09	0.04	0.13	5.76	0.3	4.63	8.33	53.42	8.13	5.25	21.16	10.26	4.19	2.31	2.18	0.83	0.75	1.45	0.36
677-3-47-02	T2M2	WT	Wild type	Wt/Wt	Wt/Wt	T3M3	3.2	35.33	18.18	2.46	0.7	0.58	1.7	2.68	0.94	1.79	1.74	1.56	2.4	4.09	5.96	1.56	1.7	1.67	1.39	0.06	0.13	0.08	0.04	0.12	6.27	0.4	4.92	8.43	54.77	8.25	5.43	18.44	10.46	4.37	2.27	2.19	0.79	0.74	1.46	0.37
677-3-47-03	T2M2	WT	Wild type	Wt/Wt	Wt/Wt	T3M3	2.52	27.78	21.46	2.04	0.54	0.46	1.41	2.18	0.77	1.46	1.42	1.27	1.67	3.09	4.23	1.26	1.34	1.29	1.16	0.02	0.12	0.16	0.03	0.12	7.46	0.47	5.39	8.81	57.68	6.49	5.36	18.69	10.04	4.29	3.43	1.7	0.83	0.63	1.2	0.33
677-3-48-02	T2M2	KO-Het	Mutant	∆6/∆6	+1(+A)/+1(+A)	T3M3	2.49	35.07	5.42	2.39	0.55	0.47	1.61	2.55	0.99	1.76	1.78	1.46	2.6	3.5	5.05	1.35	1.68	1.47	1.25	0.02	0.11	0.03	0.04	0.07	13.27	0.6	4.43	9.49	42.72	17.77	4.57	26.06	10.29	5.22	1.33	2.06	0.36	0.68	1.34	0.36
677-3-48-03	T2M2	KO-Het	Wild type	Wt/Wt	Wt/Wt	T3M3	2.62	28.66	21.36	2.11	0.58	0.49	1.45	2.25	0.8	1.5	1.48	1.32	1.77	3.23	4.47	1.31	1.42	1.3	1.2	0.04	0.12	0.16	0.03	0.13	7.21	0.43	4.7	8.38	56.29	7.2	5.38	21.64	9.36	4.32	3.25	1.79	0.83	0.66	1.24	0.34
677-3-48-04	T2M2	KO-Het	Wild type	Wt/Wt	Wt/Wt	T3M3	2.96	30.73	20.28	2.19	0.62	0.51	1.51	2.34	0.83	1.58	1.53	1.39	1.94	3.45	4.79	1.38	1.49	1.44	1.24	0.06	0.13	0.13	0.03	0.13	7.6	0.49	5.03	8.67	55.86	7.4	5.44	18.84	10.62	4.63	2.63	1.88	0.8	0.68	1.3	0.35
677-3-48-05	T2M2	KO-Het	Heterozygous	Wt/∆6	Wt/+1(+A)	T3M3	3.71	35.04	16.35	2.4	0.62	0.54	1.69	2.62	0.95	1.79	1.77	1.53	2.39	3.88	5.61	1.52	1.65	1.56	1.35	0.06	0.14	0.06	0.04	0.12	7.18	0.37	4.51	8.82	52.98	10.74	5.08	21.47	9.81	3.73	1.99	2.12	0.7	0.73	1.41	0.33
677-3-48-06	T2M2	KO-Het	Heterozygous	Wt/∆6	Wt/+1(+A)	T3M3	2.46	28.76	17.53	2.13	0.57	0.47	1.46	2.28	0.82	1.55	1.5	1.35	1.84	3.24	4.45	1.29	1.49	1.34	1.23	0.04	0.13	0.14	0.04	0.12	8.84	0.25	3.53	8.63	51.67	11.69	4.94	21.58	10.05	4.22	3.02	1.82	0.68	0.67	1.27	0.31
677-3-48-08	T2M2	KO-Het	Wild type	Wt/Wt	Wt/Wt	T3M3	3.09	30.82	20.67	2.22	0.6	0.51	1.59	2.37	0.84	1.62	1.57	1.41	1.95	3.52	4.92	1.38	1.48	1.41	1.23	0.06	0.13	0.13	0.03	0.12	7.78	0.48	5.76	8.97	55.2	5.99	5.23	24.7	9.91	4.55	2.74	1.89	0.8	0.69	1.27	0.3
677-3-48-09	T2M2	KO-Het	Wild type	Wt/Wt	Wt/Wt	T3M3	2.69	30.31	21.1	2.18	0.6	0.51	1.5	2.31	0.82	1.54	1.51	1.36	1.87	3.38	4.72	1.35	1.46	1.43	1.24	0.05	0.12	0.15	0.03	0.12	7.14	0.49	5.33	8.55	54.14	7.28	5.45	21.39	9.95	4.42	2.63	1.86	0.82	0.67	1.29	0.35
677-3-48-15	T2M2	KO-Het	Heterozygous	Wt/∆6	Wt/+1(+A)	T3M3	2.2	28.66	17.91	2.14	0.57	0.48	1.46	2.25	0.81	1.54	1.5	1.34	1.78	3.22	4.31	1.28	1.44	1.37	1.21	0.04	0.13	0.14	0.04	0.12	7.93	0.24	4.49	8.87	59.98	9.36	5.15	15.2	10.18	4.27	2.61	1.82	0.67	0.65	1.25	0.32
Bert-5-01		WT-control	Wild type	Wt/Wt	Wt/Wt		2.99	37.63	18.06	2.48	0.66	0.56	1.8	2.77	0.98	1.86	1.83	1.61	2.57	4.19	6.06	1.6	1.81	1.67	1.44	0.09	0.14	0.11	0.04	0.13	4.62	0.3	4.8	8.92	48.54	7.57	5.66	25.81	10.34	5.13	1.7	2.21	0.82	0.75	1.45	0.33
Bert-5-02		WT-control	Wild type	Wt/Wt	Wt/Wt		3.09	36.7	17.82	2.45	0.67	0.56	1.75	2.76	0.97	1.86	1.82	1.6	2.54	4.14	6.11	1.61	1.78	1.65	1.42	0.07	0.14	0.09	0.04	0.12	5.51	0.28	4.14	8.5	49.92	9.03	5.51	22.34	10.67	4.54	1.83	2.23	0.82	0.75	1.49	0.36
Bert-5-03		WT-control	Wild type	Wt/Wt	Wt/Wt		2.75	37.39	17.56	2.5	0.64	0.58	1.76	2.8	0.99	1.87	1.87	1.6	2.54	4.15	6.09	1.62	1.76	1.65	1.44	0.05	0.14	0.05	0.04	0.12	4.67	0.17	4.7	8.52	51.9	7.45	5.32	24.69	9.75	3.89	2.05	2.26	0.78	0.74	1.51	0.35
Bert-5-04		WT-control	Wild type	Wt/Wt	Wt/Wt		3.23	39.62	16.98	2.61	0.66	0.59	1.85	2.98	1.05	1.98	1.97	1.68	2.77	4.4	6.59	1.69	1.85	1.72	1.52	0.06	0.14	0.06	0.04	0.12	4.43	0.3	4.62	8.43	51.97	8.38	5.54	21.2	10.46	4.13	1.24	2.38	0.84	0.77	1.57	0.38
M: Denotes mutation generation
KO: knock out
Het: Heterozygous; WT: Wild type
"∆" = deletion; "+" = insertion
