# Supplementary material for: Similar Seed Composition Phenotypes Are Observed From CRISPR-Generated In-Frame and Knockout Alleles of a Soybean KASI Ortholog
Source: Front Plant Sci. 2020 Jul 8;11:1005. doi: 10.3389/fpls.2020.01005 (PMC7381328; doi:10.3389/fpls.2020.01005)
Supplement: Supplementary file 3 [file Table_3.xlsx]

## Sheet: Supp Table 3
Supplementary Table S3. Inheritance of transgene and GmKASI edits in T1M1 progeny
	Plants with T-DNA				Plants with no T-DNA
WPT#	WT	Het	Mutant	Total	WT	Het	Mutant	Total
677-2	5	12	1	18	0	0	0	0
677-3	1	26	5	32	8	3	2	13
677-6	1	5	11	17	0	0	0	0
677-7	0	0	0	0	18	0	0	18
677-8	0	0	0	0	18	0	0	18
Presence or absence of the T-DNA was determined by PCR
Mutations were detected by a CAPS assay using the BsaWI restriction enzyme
